# Supplementary material for: Alzheimer’s Disease Microbiome Is Associated with Dysregulation of the Anti-Inflammatory P-Glycoprotein Pathway
Source: PubMed Central journal article supplement (PMC6509190; doi:10.1128/mbio.00632-19), 2019-05-07

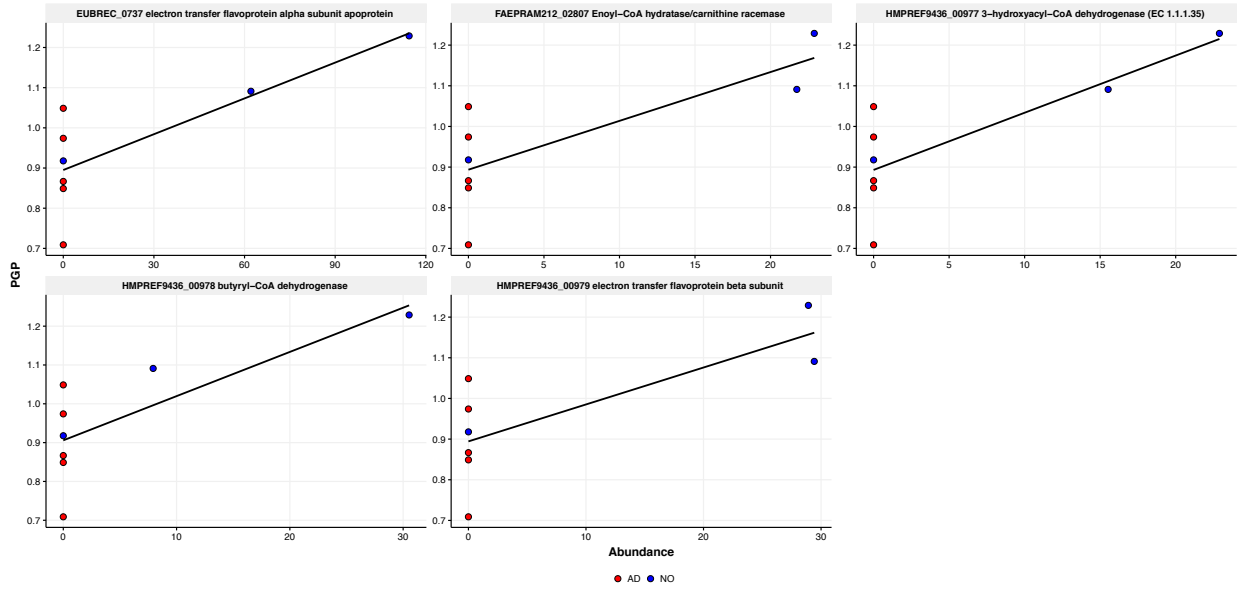

Supplement: mBio.00632-19-sf002.pdf [file mBio.00632-19-sf002.pdf]
